# Supplementary material for: Inherent limitations of the hydrogen-bonding UPy motif as self-healing functionality for polymer electrolytes
Source: Royal Society of Chemistry journal article supplement (doi:10.1039/d4lp00017j), 2024-01-01
Supplement: d4lp00017j1.pdf [file d4lp00017j1.pdf]

Supplementary Information for  
**Inherent limitations of the hydrogen-bonding UPy motif as self-healing  
functionality for polymer electrolytes**

Cuc Thu Mai, Harish Gudla, Guiomar Hernández, Kristina Edström, Jonas Mindemark

Department of Chemistry – Ångström Laboratory, Uppsala University, Uppsala, Sweden

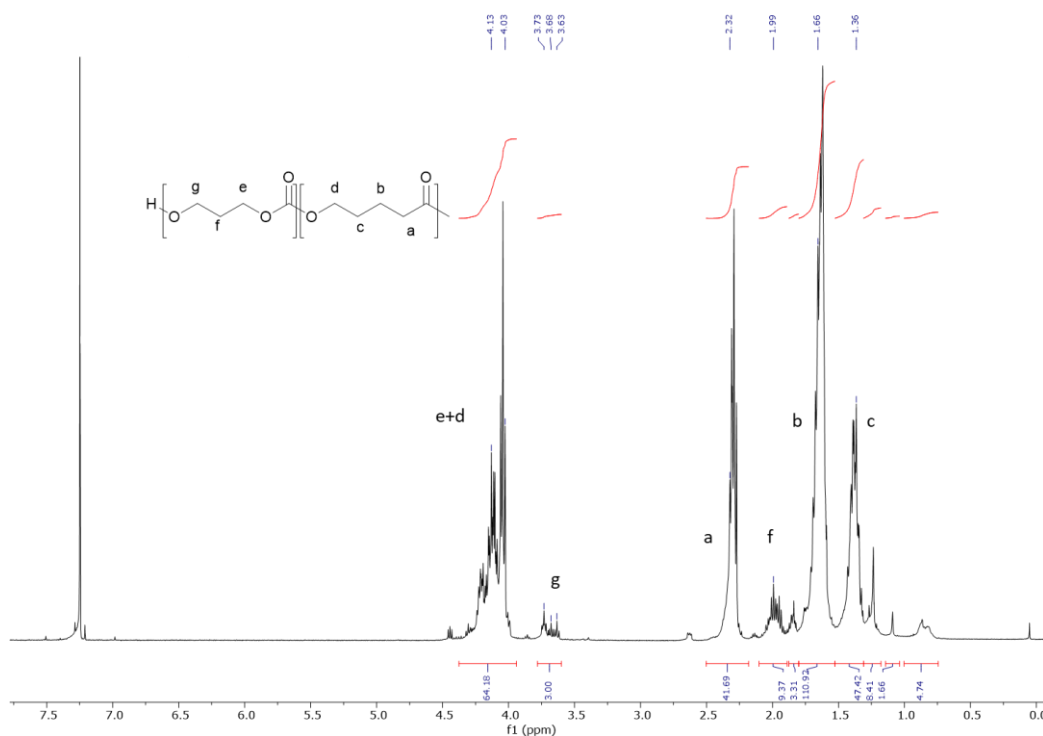

Figure S1. <sup>1</sup>H NMR spectrum of star-branched PCL-PTMC.

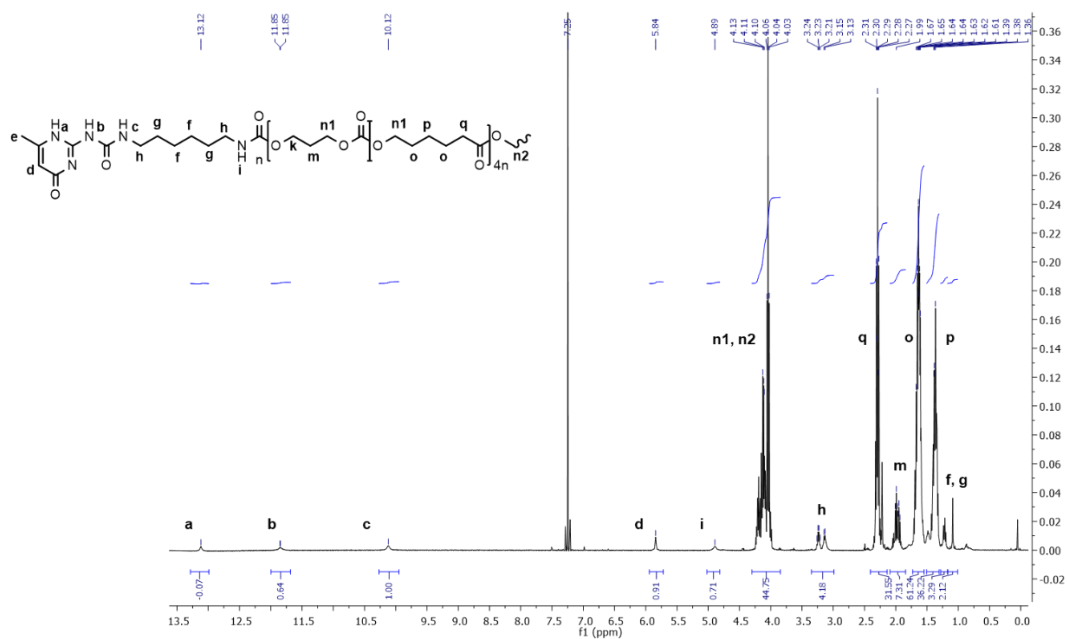

Figure S2.  $^1\text{H}$  NMR spectrum of shPCL-PTMC.

Table S1. Summary of thermal properties and ionic conductivity of unmodified PCL-PTMC and self-healing polymer electrolytes.

| Sample                         | $\sigma$ ( $\text{S cm}^{-1}$ ) at<br>$30^\circ\text{C}$ | $T_g$ ( $^\circ\text{C}$ ) | $T_m$ ( $^\circ\text{C}$ ) |
|--------------------------------|----------------------------------------------------------|----------------------------|----------------------------|
| PCL-PTMC                       | $1.2 \times 10^{-5}$                                     | -53.3                      | 54.6 & 69.9                |
| shPCL-PTMC + LiTFSI            | $2.0 \times 10^{-6}$                                     | -26.3                      | -                          |
| shPCL-PTMC + LiPF <sub>6</sub> | $1.3 \times 10^{-7}$                                     | -17.4                      | -                          |
| shPCL-PTMC + NaTFSI            | $3.0 \times 10^{-6}$                                     | -27.6                      | 48.8 & 72.3                |

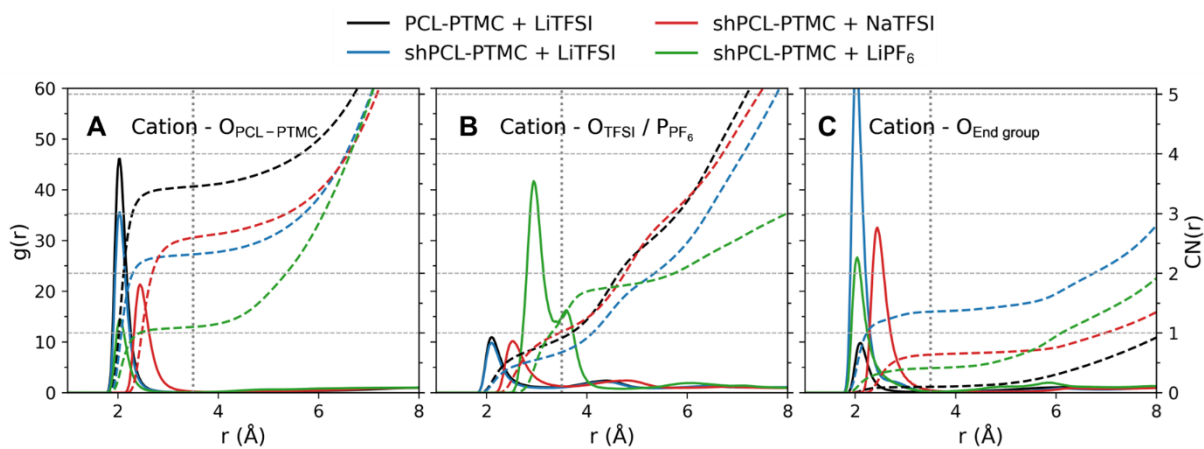

Figure S3. The radial distribution function ( $g(r)$ ) and coordination number ( $\text{CN}(r)$ ) of  $\text{Li}^+/\text{Na}^+$  with carbonyl O from PCL-PTMC (A), O from TFSI<sup>-</sup> or P from PF<sub>6</sub><sup>-</sup> (B) and O atoms from end groups i.e., OH for PCL-PTMC and UPy for shPCL-PTMC (C) with salts.

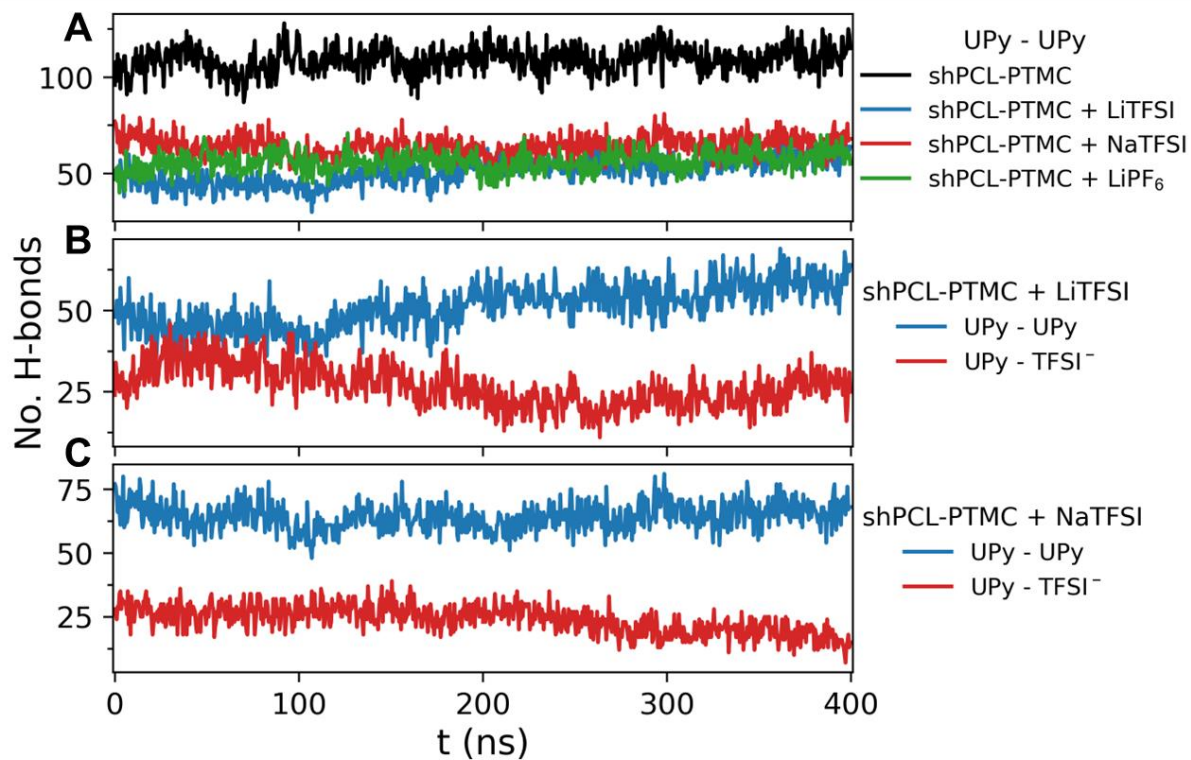

Figure S4. The total number of H-bonds as a function of simulation time between the self-healing groups (UPy – UPy) and between self-healing and TFSI<sup>-</sup> groups (UPy – TFSI<sup>-</sup>) for different polymer electrolyte systems, i.e., shPCL-PTMC with LiTFSI, NaTFSI, and LiPF<sub>6</sub>.
